1                    **Clonal seeds in hybrid rice using CRISPR/Cas9**

2

3    Chun Wang<sup>1</sup>, Qing Liu<sup>1</sup>, Yi Shen<sup>2</sup>, Yufeng Hua<sup>1</sup>, Junjie Wang<sup>1</sup>, Jianrong Lin<sup>1</sup>,  
4    Mingguo Wu<sup>1</sup>, Tingting Sun<sup>1</sup>, Zhukuan Cheng<sup>2</sup>, Raphael Mercier<sup>3</sup>, Kejian Wang<sup>1</sup>

5

6    <sup>1</sup>State Key Laboratory of Rice Biology, China National Rice Research Institute,  
7    Chinese Academy of Agricultural Sciences, Hangzhou 310006, China.

8    <sup>2</sup>State Key Laboratory of Plant Genomics, Institute of Genetics and Developmental  
9    Biology, Chinese Academy of Sciences, Beijing 100101, China.

10    <sup>3</sup>Institut Jean-Pierre Bourgin, INRA, AgroParisTech, CNRS, Université Paris-Saclay,  
11    RD10, 78000 Versailles, France.

12    Correspondence should be addressed to K.W. (wangkejian@caas.cn)

13

14 **Heterosis, the observation that first generation hybrids outcompete the parental**  
15 **lines, is widely used in increasing the productivity and yield of agricultural**  
16 **crops<sup>1,2</sup>. However, heterosis is lost in the following generations because of genetic**  
17 **segregation. In addition, the high cost of hybrid seed production hinders the**  
18 **application of heterosis in many crops. Clonal reproduction through seeds could**  
19 **be revolutionary for agriculture by allowing self-propagation of F<sub>1</sub> hybrids<sup>3,4</sup>.**  
20 **Here we show that heterozygosity of F<sub>1</sub> hybrid rice can be fixed and thus**  
21 **propagated without additional crossing. First, we showed that multiplex editing**  
22 **of three key meiotic genes<sup>5,6</sup> in hybrid rice leads to the production of clonal**  
23 **diploid gametes and tetraploid seeds. Next, editing of the *MATRILINEAL (MTL)***  
24 **gene that involved in fertilization<sup>7,8</sup> results in the induction of haploid seeds in**  
25 **hybrid rice. By simultaneous editing of these four endogenous genes in hybrid**  
26 **rice using the CRISPR/Cas9 system, we obtained in one generation plants able to**  
27 **propagate clonally through seeds. This opens the possibility to fix heterozygosity**  
28 **of hybrid varieties in food crops.**

29 Heterosis (also known as hybrid vigor) is a phenomenon whereby hybrid  
30 offspring of genetically diverse individuals display increased vigor relative to their  
31 homozygous parents. Heterosis has been widely applied in agriculture to dramatically  
32 improve the production and to broaden adaptability of crops<sup>1,2</sup>. However, the essential  
33 process of hybrid seed production increases the seed cost and even prohibits its  
34 application in many crops. It has been proposed to fix the heterosis of hybrid crop by  
35 introduction of apomixis<sup>3</sup>. Apomixis is an asexual reproductive strategy where the

36 offspring were generated through seeds, but without meiosis and fertilization.  
37 Although it has been described in many flowering plant taxa<sup>9</sup>, apomixis has not been  
38 reported in major crops. Previously, it was revealed that combined mutations of three  
39 genes that affect key meiotic processes created a genotype called *MiMe* (*Mitosis*  
40 *instead of Meiosis*) in which meiosis is totally replaced by mitotic-like division,  
41 leading to the production of male and female clonal diploid gametes in *Arabidopsis*  
42 and rice<sup>5,6</sup>. However, the self-fertilization of *MiMe* resulted in doubling of ploidy at  
43 each generation. By crossing *Arabidopsis MiMe* with CenH3-mediated chromosome  
44 elimination line, clonal diploid offspring were obtained<sup>4</sup>. However, the system still  
45 relies on the crossing between different plants and the CENH3-mediated chromosome  
46 elimination appeared to be difficult to transfer to other species<sup>10</sup>. Therefore, further  
47 work is required to achieve the aim of heterosis fixation in self-fertilized hybrids.

48 Firstly, to test the feasibility of *MiMe* technology in hybrid rice varieties, we  
49 performed experiments on Chunyou84 (CY84), an elite inter-subspecific hybrid rice  
50 from a cross between the maternal Chunjiang 16A (16A), a *japonica* male sterile line,  
51 and the paternal C84, an *indica-japonica* intermediate type line (Extended Data Fig.1).  
52 To ensure rapid generation of *MiMe* in the hybrid CY84 background, we  
53 simultaneously edited the *REC8*, *PAIR1* and *OSD1* genes using our previously  
54 developed multiplex CRISPR/Cas9 system<sup>11</sup> (Fig. 1a). In the primary transformed  
55 plants, 7 of 32 plants were identified as frameshift triple mutants, and three of them  
56 were analyzed (Extended Data Fig.2). The triple mutant (*MiMe*) could not be  
57 distinguished from the wild-type CY84 based on its growth or morphology (Extended

58 Data Fig.3). To test whether the meiosis was turned into a mitotic-like division, we  
59 investigated the male meiotic chromosome behavior in both wild type and *MiMe*. In  
60 the wild-type CY84 (Extended Data Fig.4a-f), 12 bivalents were scattered at  
61 diakinesis and aligned along the equatorial plate at metaphase I. The 12 pairs of  
62 homologous chromosomes separated at anaphase I and produced tetrad spores after  
63 the second meiotic division. In *MiMe* (Extended Data Fig.4g-i), 24 univalents were  
64 found in diakinesis and aligned at metaphase I. In anaphase I, 24 pairs of chromatids  
65 segregated into two groups and produced dyads of spores, suggesting that the meiosis  
66 has been turned into a mitotic-like division. We next examined the ploidy of spores of  
67 *MiMe* by performing fluorescent in situ hybridization (FISH) analyses using a 5S  
68 rDNA-specific probe, which identifies chromosome 11 of rice. Only one signal was  
69 observed in CY84 spores (n=30), while two signals were constantly observed in  
70 *MiMe* spores (n=40, Fig. 1b), showing that diploid gametes were generated in *MiMe*.  
71 We also investigated the fertility of *MiMe* mutant and found that the panicle seed  
72 setting rate in *MiMe* was ~81.2% (n=4043), which is comparable to that of wild type  
73 (~79.1%, n=3876), (Fig.1c, Table 1), suggesting that simultaneously editing of these  
74 three genes do not obviously affect fertility in this hybrid variety. The ploidy of the  
75 progeny of *MiMe* plant was investigated by flow cytometry and all (n=123) were  
76 found to be tetraploid plants (Fig.1d, Table 1). Further, we found that these progenies  
77 (n=123) retained completely the heterozygosity of their parent CY84 for 10 tested  
78 Insertion-deletion (Indel) makers (Fig.1e). And these progenies of *MiMe* displayed  
79 reduced fertility, increased grain size and elongated awn length compared to wild type,

80 all of which being typical characteristics of tetraploid rice (Fig.1f). These results show  
81 that the *MiMe* phenotype can be rapidly introduced into hybrid rice varieties using  
82 CRISPR/Cas9 genome editing technique.

83 *MiMe* clonal gametes participate in normal self-fertilization, giving rise to  
84 progeny with doubled ploidy. This ploidy doubling must be prevented to achieve  
85 apoximis. Recently, it was reported that the *MATRILINEAL* (*MTL*) gene, a  
86 sperm-specific phospholipase, triggers haploid induction in maize<sup>7,8</sup>. To test whether  
87 the homologous gene could be manipulated to induce haploid in self-fertilized hybrid  
88 rice, we edited the *MTL* gene in CY84 (Fig. 2a). 11 of 32 transformed plants were  
89 identified as frameshift mutants, and three of them were analyzed (Extended Data  
90 Fig.5). The *mtl* mutants showed normal vegetative growth (Extended Data Fig.3), but  
91 the seed-setting rates significantly reduced to ~11.5% (n=5180, Fig. 2b, Table 1). 12  
92 Indel markers (1 per chromosome) that were polymorphic between the two parents  
93 were used to determine the genotype of the progenies of *mtl* plants (Extended Data  
94 Table1). In the wild-type CY84 progeny, no plants homozygous at all markers were  
95 found (n=220, Table 1). In contrast, 11 plants among 248 *mtl* progenies appeared to be  
96 homozygous for all markers (Fig. 2c, Table 1). Flow cytometry results showed that 9  
97 of these plants were indeed haploid, while 2 were diploid, presumably resulting from  
98 spontaneous doubling of haploid embryos (Fig. 2d, Table 1). To further classify the  
99 genotype of those identified plants, the whole genomes of 2 haploids, 2 doubled  
100 haploids of *mtl* progenies, and 2 offspring plants of wild-type CY84 were resequenced  
101 with a depth of 30-fold. A total of 78,909 single nucleotide polymorphisms (SNPs)

102 that differed between two parents were screened out for detailed genotype analysis.  
103 Whole genome sequencing revealed that the haploids and doubled haploids were  
104 homozygous at all loci (Fig. 2e), and recombinant compared to the parental genome,  
105 suggesting that they are respectively derived from a single gamete. The haploid plants  
106 showed reduced plant height, decreased glume size and loss of fertility, while the  
107 doubled haploid plant displayed normal vegetative and reproductive growth (Fig. 2f).  
108 The results demonstrated that haploid plants can be generated by self-fertilization of  
109 hybrid varieties.

110 Since turning meiosis into mitosis and paternal genome elimination is possible in  
111 self-fertilized hybrid rice, we next test the possibility of inducing heterozygosity  
112 fixation without additional crossing in hybrid rice by simultaneously editing four  
113 genes, namely *OSD1*, *PAIR1*, *REC8* and *MTL* in CY84 (Fig. 3a-b). Among 22  
114 transgenic plants, three were identified by DNA sequencing as *osd1/pair1/rec8/mtl*  
115 quadruple mutants (namely *Fix*, *Fixation of hybrids*) and used for further analysis  
116 (Extended Data Fig.6). The *Fix* mutants grew normally during the vegetative stage  
117 (Fig. 3c). During reproductive stage, the male meiotic chromosome behavior was  
118 investigated and found to be indistinguishable from that of *MiMe* (Extended Data  
119 Fig.4j-l). The panicle seed setting percentage was found to be ~4.5% (n=5850) (Table  
120 1, Fig. 3c), which is slightly lower than that of the *mtl* mutant. In the progeny  
121 seedlings, the ploidy was investigated using flow cytometry. Among 145 progeny of  
122 *Fix* mutants, 136 were identified as tetraploid and 9 as diploid (Fig. 3d, Table 1). To  
123 investigate whether the heterozygosity was fixed in these diploid offspring, the

124 genomes of 2 diploid and 2 tetraploid offspring plants of *Fix* were resequenced with  
125 an average of 30× coverage. Bioinformatic analysis revealed that all the 78,909  
126 SNPs were heterozygous in both these diploid and tetraploid progeny plants, and were  
127 thus genetically identical to the hybrid rice CY84 (Fig. 3e). Finally, we investigated  
128 the phenotype of the potential clonal plants of *Fix*. All these 9 diploid plants displayed  
129 normal glume size and awn length, and showed a reduced seed setting (~10%,  
130 n=2726), which were similar to their parent *Fix* plants (Fig. 3f). Taken together, the  
131 diploid progeny of *Fix* plant displayed the same ploidy, the same heterozygous  
132 genotype, and the similar phenotype with the parent *Fix* plants, implying that *Fix* is  
133 able to produce clonal seeds and fix the heterozygosity of hybrid rice.

134 Our findings revealed that hybrids can be self-propagated through seeds by  
135 targeted editing of four endogenous genes in rice hybrid varieties. Simultaneous  
136 editing of *REC8*, *PAIR1* and *OSD1* genes does not have obvious adverse effects on the  
137 growth and reproduction of the hybrid. On contrast, the *MTL* gene used to induce  
138 paternal genome elimination has impacts on rice fertility and is not fully penetrant;  
139 further work is thus required to allow this technology to reach the rice fields. However,  
140 the findings in this study revealed a strategy to fix heterozygosity in rice. Considering  
141 the establishment of multiplex genome editing technology in many other crops along  
142 with the conservation of these four genes, the strategy might extend heterosis  
143 application in agriculture.

144

## 145 **Methods**

146 **Plasmid construction.** The plasmids expressing the CRISPR/Cas9 system were  
147 constructed *via* the isocaudamer ligation method, as previously described<sup>11</sup>. The  
148 modified single guide RNAs (sgRNAs) scaffold and *ACTIN1* promoter-driven Cas9  
149 were used to increase the mutation rate in this study<sup>12</sup>. Briefly, the double-stranded  
150 overhangs of target oligoes (listed in Extended Data Table1) were ligated into the  
151 SK-sgRNA vectors digested with *AarI*. Then the sgRNAs of *OSD1* (digested with  
152 *KpnI* and *Sall*), *PAIR1* (digested with *XhoI* and *BglII*) and *REC8* (digested with  
153 *BamHI* and *NheI*) were assembled into one pC1300-ACT:Cas9 binary vector  
154 (digested with *KpnI* and *XbaI*) using T4 ligase to obtain the vector  
155 pC1300-ACT:Cas9-sgRNA<sup>OSD1</sup>-sgRNA<sup>PAIR1</sup>-sgRNA<sup>REC8</sup> for generation of *MiMe*.  
156 The sgRNA of *MTL* (digested with *KpnI* and *NheI*) was assembled into  
157 pC1300-ACT:Cas9 binary vector (digested with *KpnI* and *XbaI*) to obtain the vector  
158 pC1300-ACT:Cas9-sgRNA<sup>MTL</sup> for generation of *mtl*. The sgRNA of *MTL* (digested  
159 with *KpnI* and *NheI*) was assembled into  
160 pC1300-ACT:Cas9-sgRNA<sup>OSD1</sup>-sgRNA<sup>PAIR1</sup>-sgRNA<sup>REC8</sup> vector (digested with *KpnI*  
161 and *XbaI*) to obtain the vector pC1300-ACT:Cas9-sgRNA<sup>OSD1</sup>-sgRNA<sup>PAIR1</sup>-  
162 sgRNA<sup>REC8</sup>-sgRNA<sup>MTL</sup> for generation of *Fix*.

163 **Rice transformation and growth conditions.** The hybrid rice Chunyou 84 (CY84)  
164 was used as the host variety in this study. The generation of transgenic rice, by  
165 *Agrobacterium*-mediated transformation with the strain EHA105, was performed by  
166 the Biogle company (Hangzhou, China).



167 The T<sub>0</sub> generation of transgenic plants were grown in the transgenic paddy fields  
168 of the China National Rice Research Institute in Hangzhou, China (at N 30.32° , E  
169 120.12° ) in the summer of 2017. The T<sub>1</sub> plants were grown in greenhouse in the  
170 winter of 2017.

171 **Detection of genome modifications.** Genomic DNA was extracted from  
172 approximately 100 mg of rice leaf tissue *via* the CTAB method. PCR was conducted  
173 with KOD FX DNA Polymerase (Toyobo, Osaka, Japan) to amplify the genomic  
174 regions surrounding the target sites. The primers are listed in Extended Data Table1.  
175 The fragments were sequenced by the Sanger method and decoded by the degenerate  
176 sequence decoding method<sup>13</sup>.

177 **Cytological analyses.** Young panicles of meiosis stage were harvested and fixed in  
178 Carnoy's solution (ethanol:glacial acetic, 3:1). Microsporocytes undergoing meiosis  
179 were squashed in an acetocarmine solution. Slides were frozen in liquid nitrogen and  
180 the coverslips were removed with a blade quickly. Chromosomes were counterstained  
181 with 4',6-diamidinophenylindole (DAPI) in an antifade solution (Vector Laboratories,  
182 Burlingame, CA). Microscopy was conducted using an Olympus BX61 fluorescence  
183 microscope with a microCCD camera.

184 Fluorescence *in situ* hybridization (FISH) analysis was conducted as described  
185 previously<sup>14</sup>. The plasmid pTa794 was used as FISH probe to quantify the 5S rDNA.

186 **Genotyping with Indel Markers.** Insertion-deletion (Indel) markers to distinguish  
187 genotypes of heterozygote and homozygote were designed based on the  
188 whole-genome sequences of C84 and 16A. The primers are listed in Extended Data

189 Table1. The genotyping was performed by normal PCR program using 2× Taq Master  
190 Mix (Novoprotein Scientific, China), and the PCR products were detected using 5%  
191 agarose gels.

192 **Flow cytometry determination of DNA content in leaf cell nuclei.** The ploidy of  
193 leaf cell was determined by estimating nuclear DNA content using flow cytometry.  
194 All procedures were done at 4 °C or on ice. Approximately ~ 2 cm<sup>2</sup> of leaf tissue was  
195 chopped using a new razor blade for 2 to 3 minutes in 1 ml LB01 Buffer (15 mM Tris,  
196 2 mM Na<sub>2</sub>EDTA, 0.5 mM spermine tetrahydrochloride, 80 mM KCl, 20 mM NaCl,  
197 0.1% Triton X-100, 15 mM β-mercaptoethanol, pH 7.5, filter through a 0.22 μm  
198 filter). The homogenate was filtered through the 40-μm nylon filter followed by  
199 centrifugation (1200× rpm, 5 min) to collect the nuclei. The supernatant was  
200 discarded and the pellet was resuspended with 450 μL of fresh LB01 Buffer, then 25  
201 μl of 1 mg/ml propidium iodide (PI, Sigma P4170) and 25 μl of 1 mg/ml DNase-free  
202 RNase A (Sigma V900498) were added to stain the DNA. The stained samples were  
203 incubated on ice in darkness for 10 minutes prior to analysis. The samples were  
204 analyzed using BD Accuri C6 flow cytometer, with the laser illumination at 552 nm  
205 and 610/20 nm filter. The gating strategy was provided in Supplementary Information.  
206 Samples with the same result of CY84 were deemed as diploids, which the first peak  
207 of relative fluorescence at ~100 (x10,000). And the samples with the first peak of  
208 relative fluorescence at ~50 (x10,000) were deemed as haploids, while samples with  
209 the first peak of relative fluorescence at ~200 (x10,000) were deemed as tetraploids.

210 **Whole genome re-sequencing and genotype calling.** The 150-bp paired-end reads

211 were generated by Illumina Hiseq2500, covering approximately an average depth of  
212 30× for each sample. The short-read sequence data have been deposited in the NCBI  
213 Sequence Read Archive (SRP149641, SRP149677). The raw paired-end reads were  
214 first filtered into clean data using NGSQCtoolkit v2.3.3<sup>15</sup>. The cutoff value for  
215 PHRED quality score was set to 30. Clean reads of each accession were aligned  
216 against the rice reference genome (IRGSP 1.0) using the software SOAPaligner ( soap  
217 version 2.21)<sup>16</sup> with the parameters of ‘-m 200, -x 1000, -l 35, -s 42, -v 5’ and ‘-p 8’.  
218 To get high-quality SNPs, reads that could be mapped to different genomic positions  
219 were excluded by SOAPsnp<sup>17</sup>. Uniquely mapped single-end and paired-end results  
220 were used in the SNP calling. Genotype calling was carried out in the whole genome  
221 region using these SNPs which are heterozygous in the parent. The window size (the  
222 number of n consecutive SNPs in a window) was 0.1 K. And the recombination map  
223 was constructed for each chromosome.

224 **Data availability.** Whole genome sequencing data are deposited in the NCBI  
225 Sequence Read Archive (SRP149641, SRP149677). Patent applications have been  
226 filed relating to work in this manuscript.

227

228 1 Schnable, P. S. & Springer, N. M. Progress toward understanding heterosis in crop plants.  
229 *Annu Rev Plant Biol* **64**, 71-88 (2013).

230 2 Birchler, J. A., Auger, D. L. & Riddle, N. C. In search of the molecular basis of heterosis.  
231 *Plant Cell* **15**, 2236-2239 (2003).

232 3 Spillane, C., Curtis, M. D. & Grossniklaus, U. Apomixis technology development-virgin  
233 births in farmers' fields? *Nat Biotechnol* **22**, 687-691 (2004).

234 4 Marimuthu, M. P. A. *et al.* Synthetic clonal reproduction through seeds. *Science* **331**, 876

- 235 (2011).
- 236 5 d'Erfurth, I. *et al.* Turning meiosis into mitosis. *PLoS Biology* **7**, e1000124 (2009).
- 237 6 Mieulet, D. *et al.* Turning rice meiosis into mitosis. *Cell Research* **26**, 1242-1254 (2016).
- 238 7 Kelliher, T. *et al.* MATRILINEAL, a sperm-specific phospholipase, triggers maize  
239 haploid induction. *Nature* **542**, 105-109 (2017).
- 240 8 Li, X. *et al.* Single nucleus sequencing reveals spermatid chromosome fragmentation as a  
241 possible cause of maize haploid induction. *Nat Commun* **8**, 991 (2017).
- 242 9 Sailer, C., Schmid, B. & Grossniklaus, U. Apomixis Allows the Transgenerational  
243 Fixation of Phenotypes in Hybrid Plants. *Curr Biol* **26**, 331-337 (2016).
- 244 10 Karimi-Ashtiyani, R. *et al.* Point mutation impairs centromeric CENH3 loading and  
245 induces haploid plants. *Proc Natl Acad Sci U S A* **112**, 11211-11216 (2015).
- 246 11 Wang, C., Shen, L., Fu, Y., Yan, C. & Wang, K. A Simple CRISPR/Cas9 System for  
247 Multiplex Genome Editing in Rice. *Journal of genetics and genomics* **42**, 703-706 (2015).
- 248 12 Hu, X., Meng, X., Liu, Q., Li, J. & Wang, K. Increasing the efficiency of  
249 CRISPR-Cas9-VQR precise genome editing in rice. *Plant Biotechnology Journal* **16**,  
250 292-297 (2018).
- 251 13 Ma, X., Chen, L., Zhu, Q., Chen, Y. & Liu, Y. G. Rapid Decoding of Sequence-Specific  
252 Nuclease-Induced Heterozygous and Biallelic Mutations by Direct Sequencing of PCR  
253 Products. *Mol Plant* **8**, 1285-1287 (2015).
- 254 14 Zhang, W. *et al.* The transcribed 165-bp CentO satellite is the major functional  
255 centromeric element in the wild rice species *Oryza punctata*. *Plant Physiol* **139**, 306-315  
256 (2005).
- 257 15 Patel, R. K. & Jain, M. NGS QC Toolkit: a toolkit for quality control of next generation  
258 sequencing data. *PLoS One* **7**, e30619 (2012).
- 259 16 Li, R. *et al.* SOAP2: an improved ultrafast tool for short read alignment. *Bioinformatics*  
260 **25**, 1966-1967 (2009).
- 261 17 Li, R. *et al.* SNP detection for massively parallel whole-genome resequencing. *Genome*  
262 *Res* **19**, 1124-1132 (2009).

263  
264

265 **Acknowledgements** This research was supported by the Agricultural Science and  
266 Technology Innovation Program of Chinese Academy of Agricultural Sciences, and  
267 the National Natural Science Foundation of China (No. 31401363).

268 **Author Contributions** C.W., and K.W. conceived and designed the study. C.W., Y.S.,  
269 and Z.C. performed the lab experiments. Q.L., and T.S. conducted the computational  
270 analyses. Y.H., and J.W. carried out the field experiments. J.L., and M.W. provided the  
271 rice varieties and helped with the field management. C.W., R.M., and K.W. wrote the  
272 manuscript.

273

274 **Table1 Ploidy analysis of the progeny of CY84, *MiMe*, *mtl* and *Fix* lines**

275

|             | Line | Seed setting percentage | Progeny tested | Haploid+DH (%) | Diploid (%) | Tetraploid (%) |
|-------------|------|-------------------------|----------------|----------------|-------------|----------------|
| CY84        | #1   | 77.2% (1151/1490)       | 65             | 0              | 65          | 0              |
|             | #2   | 81.3% (951/1170)        | 73             | 0              | 73          | 0              |
|             | #3   | 79.1% (962/1216)        | 82             | 0              | 82          | 0              |
| <i>MiMe</i> | #1   | 81.9% (1178/1439)       | 35             | 0              | 0           | 35 (100%)      |
|             | #2   | 79.2% (877/1108)        | 43             | 0              | 0           | 43 (100%)      |
|             | #3   | 82.1% (1228/1496)       | 45             | 0              | 0           | 45 (100%)      |
| <i>mtl</i>  | #1   | 9.1% (101/1103)         | 77             | 6+0 (7.8%)     | 71          | 0              |
|             | #2   | 13.6% (217/1601)        | 90             | 2+1 (3.3%)     | 87          | 0              |
|             | #3   | 11.3% (280/2476)        | 81             | 1+1 (2.5%)     | 79          | 0              |
| <i>Fix</i>  | #1   | 3.7% (63/1725)          | 39             | 0              | 2 (5.1%)    | 37             |
|             | #2   | 5.2% (124/2373)         | 64             | 0              | 3 (4.7%)    | 61             |
|             | #3   | 4.3% (76/1752)          | 42             | 0              | 4 (9.5%)    | 38             |

276

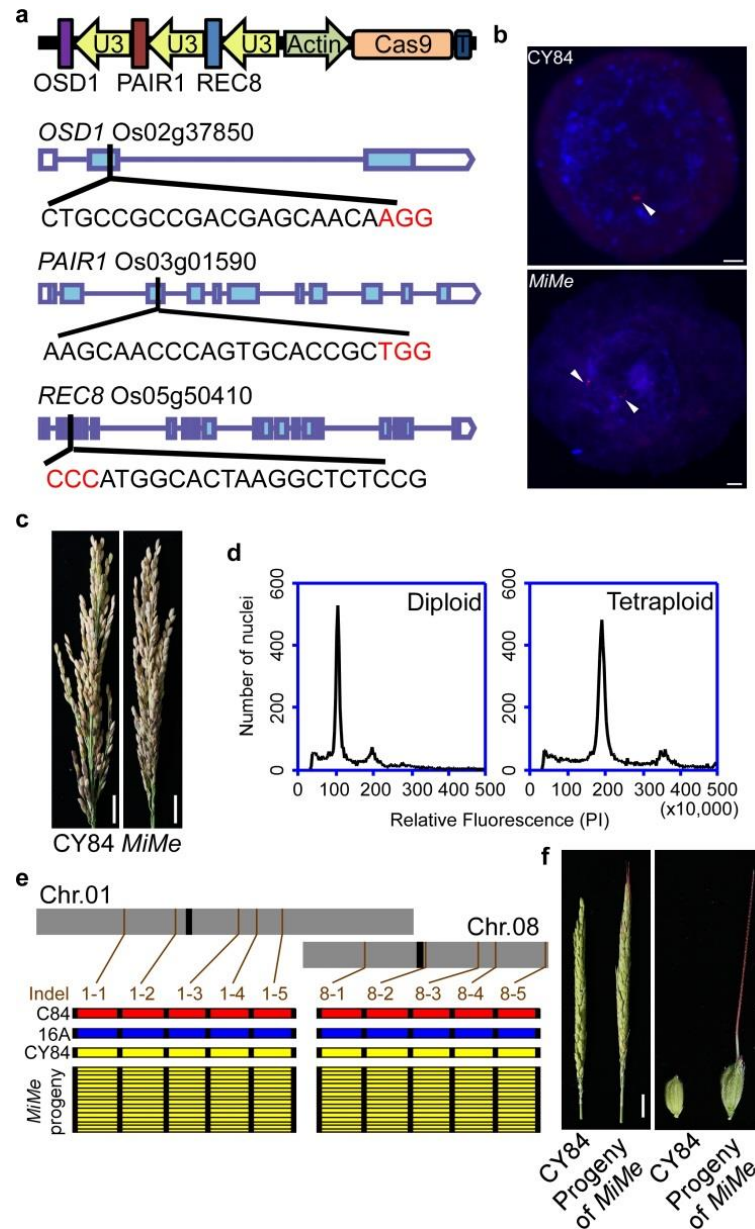

277

278 **Figure 1 | Turning meiosis into mitosis in hybrid rice variety Chunyou84 (CY84).**

279 **a**, Schematic diagram of the structure of CRISPR/Cas9 vector targeting *OSD1*, *PAIR1*

280 and *REC8*. **b**, The chromosomes of CY84 and *MiMe* were probed by

281 digoxigenin-16-dUTP-labeled 5S rDNA (red signal, indicated with white arrow) in

282 spores, showing one signal in wild-type CY84 and two signals in *MiMe*. Scale bars, 5

283  $\mu\text{m}$ . **c**, Panicles of wild-type CY84 and *MiMe*. The fertility of *MiMe* is as high as that

284 of wild-type CY84. Scale bars, 2 cm. **d**, Ploidy analysis of CY84 (left) and the

285 progeny of *MiMe* (right) by flow cytometry, which is found to be diploid and  
286 tetraploid, respectively (Table 1). **e**, Genotype analysis of the paternal C84, maternal  
287 Chunjiang 16A (16A), hybrid variety Chunyou84 (CY84) and the progeny siblings of  
288 *MiMe*. 10 Indel markers distributed on chromosomes 1 and 8 were used to identify the  
289 genotype of the offspring of *MiMe*. Positions of markers (brown) and centromeres  
290 (black) are indicated along the chromosomes. For each marker, plants carrying the  
291 C84 allele are in red, plants carrying the 16A allele are in blue, while plants with both  
292 C84 and 16A alleles appear in yellow. Each row represents one plant, and each  
293 column indicates a locus. **f**, Panicles and grain shape of CY84 and the progeny of  
294 *MiMe*. The progeny of *MiMe* displayed reduced fertility, increased glume size and  
295 elongated awn length. Scale bars, 2 cm.  
296



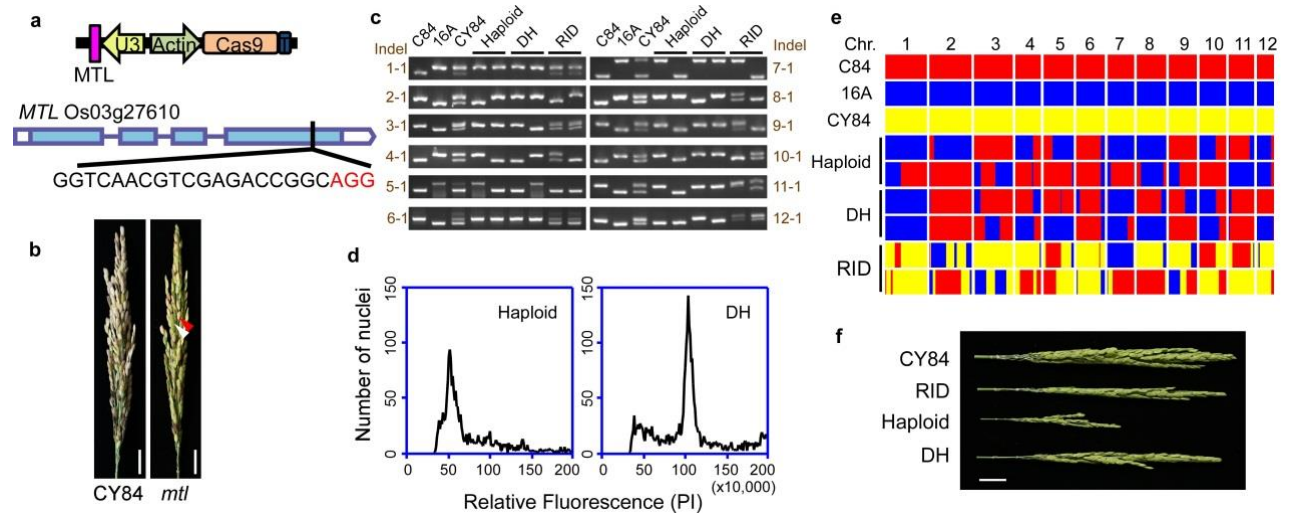

297

298 **Figure 2 | Generation of haploid inducer line by editing the *MTL* gene in hybrid**

299 **rice variety CY84. a, Schematic diagram of the structure of CRISPR/Cas9 vector**

300 **targeting *MTL*. b, Panicles of the WT and *mtl* in CY84 background. The fertility was**

301 **decreased in *mtl*, white arrow indicates aborted seed, and red arrow shows fertile seed.**

302 **Scale bars, 2 cm. c, Determination of the genotype of haploids, doubled haploids (DH)**

303 **and recombinant inbred diploids (RID) using 12 Indel markers (1 per chromosome).**

304 **Plants homozygous at all markers in the progeny siblings of *mtl* were identified as**

305 **haploid or DH. d, Ploidy analysis of the haploid and DH by flow cytometry (Table 1).**

306 **e, Whole genome sequencing of the haploid, DH and RID plants. 12 blocks represent**

307 **12 chromosomes. The SNPs of C84 allele are in red, the SNPs of 16A allele are in**

308 **blue, and co-existence of both alleles are in yellow. f, Panicles of wild-type CY84 and**

309 ***mtl* progeny, including RID, haploid and DH plants. Scale bars, 2 cm.**

310

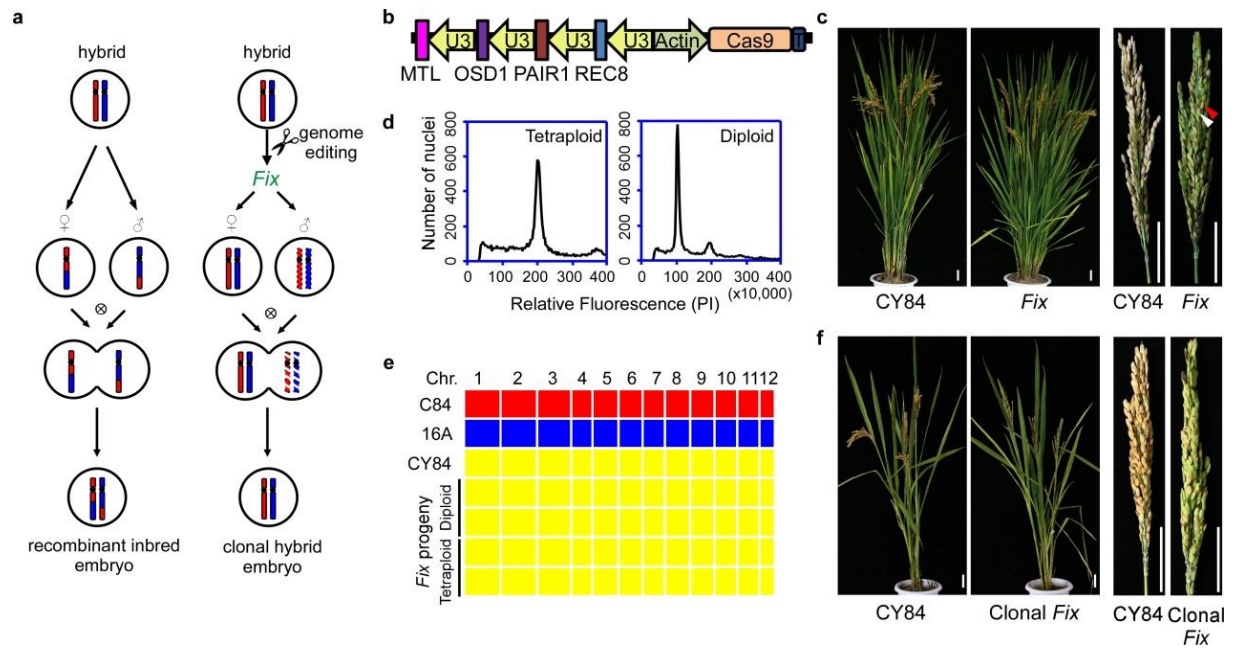

311

312 **Figure 3 | Fixation of rice heterozygosity by multiplex gene editing in hybrid rice**

313 **variety CY84. a**, The model of fixation of heterozygosity of hybrid. In normal sexual

314 reproduction (left), recombinant inbred embryos are generated by fusion of

315 recombined haploid gametes. The clonal reproduction strategy (right) is based on two

316 components: meiosis is turned into mitosis to produce clonal diploid gametes (*MiMe*),

317 and the genome of male gamete is eliminated by knocking out the *MTL* gene. The

318 progeny of self-fertilized *Fix* is genetically identical to the hybrid parent. **b**,

319 Schematic diagram of the structure of CRISPR/Cas9 vector simultaneously targeting

320 *OSD1*, *PAIR1*, *REC8* and *MTL*. **c**, Comparison of the morphology and panicles of

321 CY84 and *Fix* (*osd1 pair1 rec8 mtl*). The fertility was decreased in *Fix*. An aborted

322 seed is indicated with white arrow, and a normally developed seed is indicated with

323 scale bars, 5 cm. **d**, Ploidy analysis of the progeny of *Fix* by flow

324 cytometry, including tetraploid (left) and diploid (right), respectively. **e**, Whole

325 genome sequencing of the diploid and tetraploid progenies of *Fix*. The SNPs of C84

326 allele are in red, the SNPs of 16A allele are in blue, and co-existence of both alleles  
327 are in yellow. 12 blocks represent 12 chromosomes. The diploid and tetraploid  
328 progenies of *Fix* are heterozygous, identical to CY84. **f**, Comparison the morphology  
329 and panicles of wild-type CY84 and the diploid progeny of *Fix*. Both plants were  
330 grown in the glasshouse. The clonal *Fix* displayed normal growth except the reduced  
331 fertility, which is similar to that of parent *Fix* plant. Scale bars, 5 cm.
